# Supplementary material for: Diblock, Triblock and Cyclic Amphiphilic Copolymers with CO2 Switchability: Effects of Topology
Source: Polymers (Basel). 2020 Apr 24;12(4):984. doi: 10.3390/polym12040984 (PMC7240586; doi:10.3390/polym12040984)

# Diblock, Triblock and Cyclic Amphiphilic Copolymers with CO<sub>2</sub> Switchability: Effects of Topology

Yuting Jiang <sup>1</sup>, Tong Zhang <sup>1</sup>, Zheng Yi <sup>2</sup>, Yixiu Han <sup>2</sup>, Xin Su <sup>1,\*</sup> and Yujun Feng <sup>1,\*</sup>

<sup>1</sup> Polymer Research Institute, State Key Laboratory of Polymer Materials Engineering, Sichuan University, Chengdu 610065, China; jiangyt99@126.com (Y.J.); zhangtong2099@163.com (T.Z.)

<sup>2</sup> The Second Research Institute of Civil Aviation Administration of China, Chengdu 610041, China; yizheng@caacsri.com (Z.Y.); hanyixiu@caacsri.com (Y.H.)

\* Correspondence: xinsu@scu.edu.cn (X.S.); yjfeng@scu.edu.cn (Y.F.); Tel.: +86-28-85408037(X.S&Y.F.)

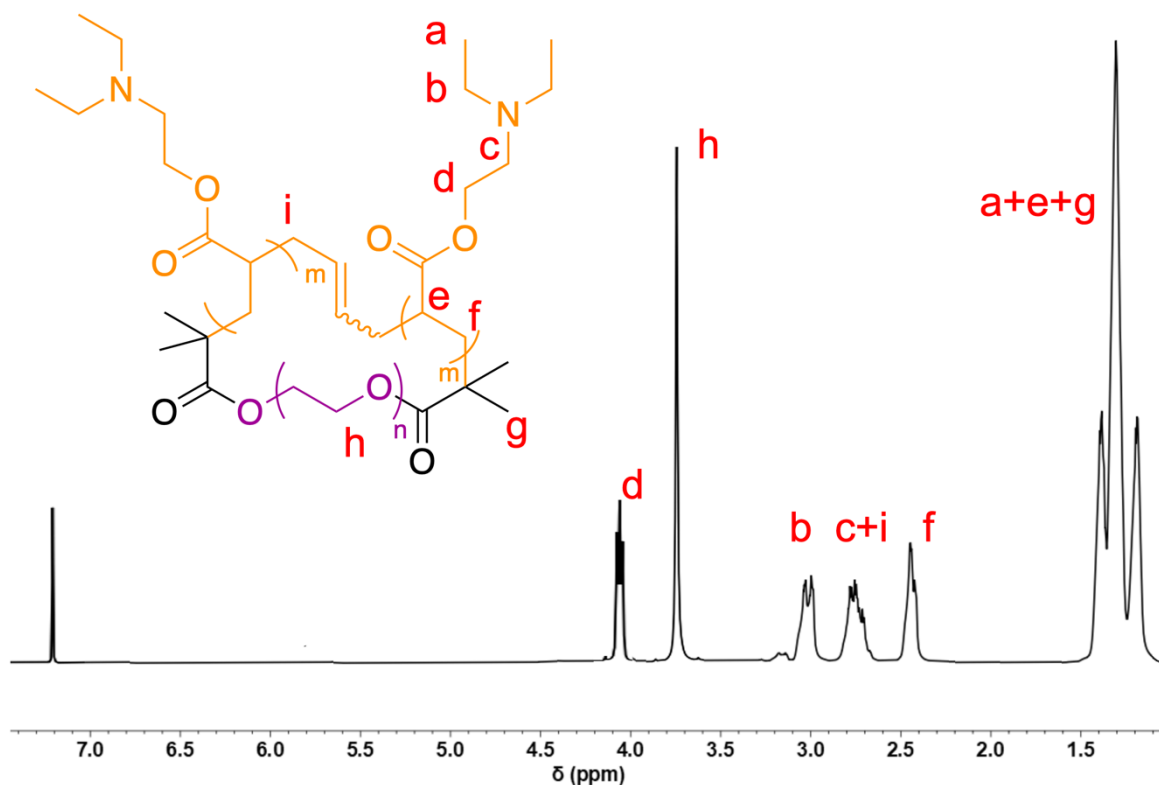

Figure S1. <sup>1</sup>H NMR spectrum of polymer 1. CCID<sub>3</sub> was used as solvent.

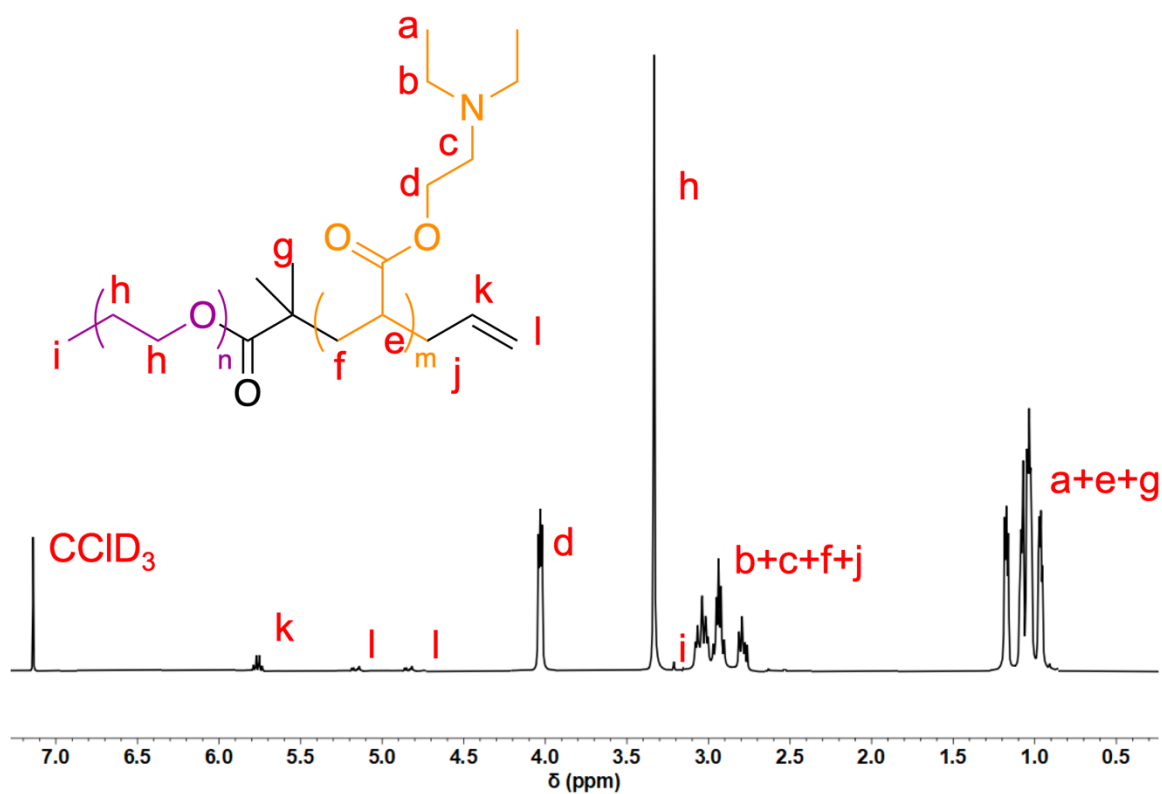

Figure S2.  $^1\text{H}$  NMR spectrum of polymer 2. CDCl<sub>3</sub> was used as solvent.

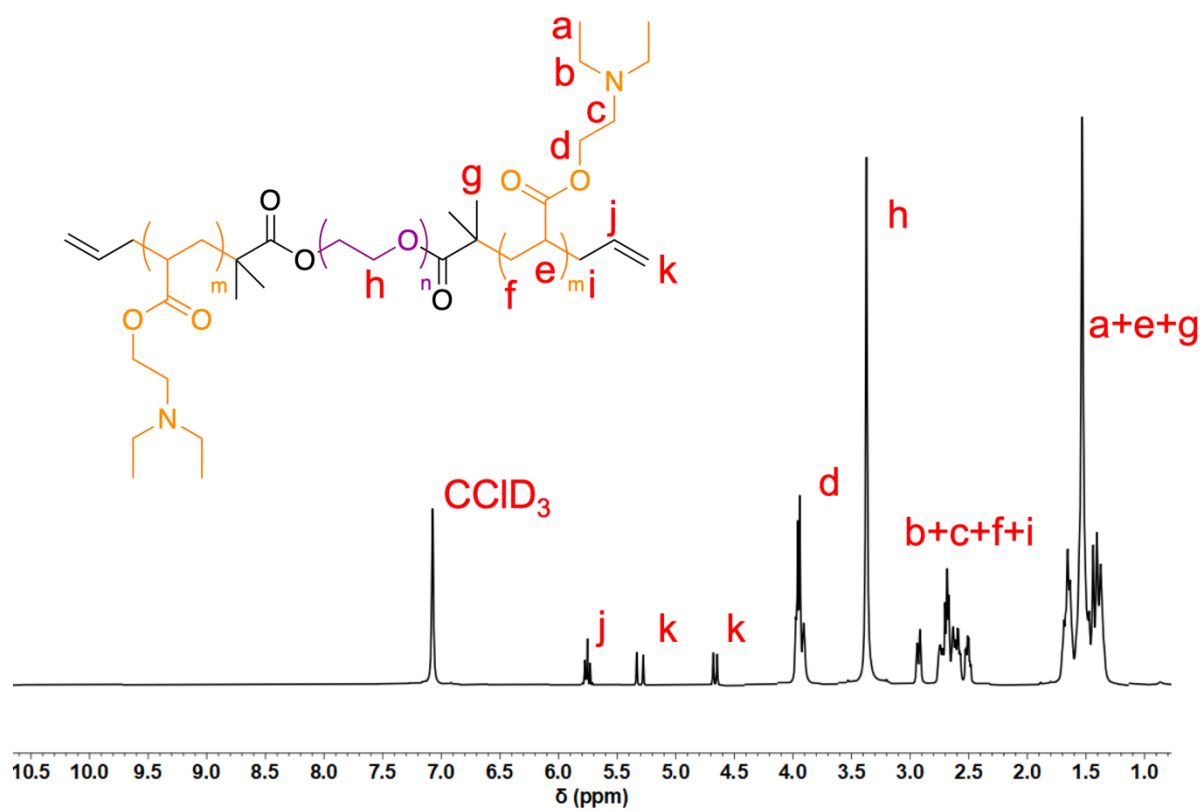

Figure S3.  $^1\text{H}$  NMR spectrum of polymer 3. CDCl<sub>3</sub> was used as solvent.

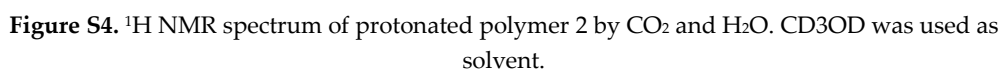

Supplement: Supplementary file 1 [file polymers-12-00984-s001.pdf]
